# Supplementary material for: Construction and Characterization of Synthetic Bacterial Community for Experimental Ecology and Evolution
Source: PubMed Central journal article supplement (PMC6102323; doi:10.3389/fgene.2018.00312), 2018-08-14
Supplement: Data_Sheet_1.pdf [file Data_Sheet_1.pdf]

Supplementary Material for

**Construction and Characterization of Synthetic Bacterial Community for  
Experimental Ecology and Evolution**

Johannes Cairns, Roosa Jokela, Jenni Hultman, Manu Tamminen, Marko Virta and Teppo Hiltunen

Correspondence to: [teppo.hiltunen@helsinki.fi](mailto:teppo.hiltunen@helsinki.fi)

**This PDF file includes:**

Figure S1

Tables S1 to S3

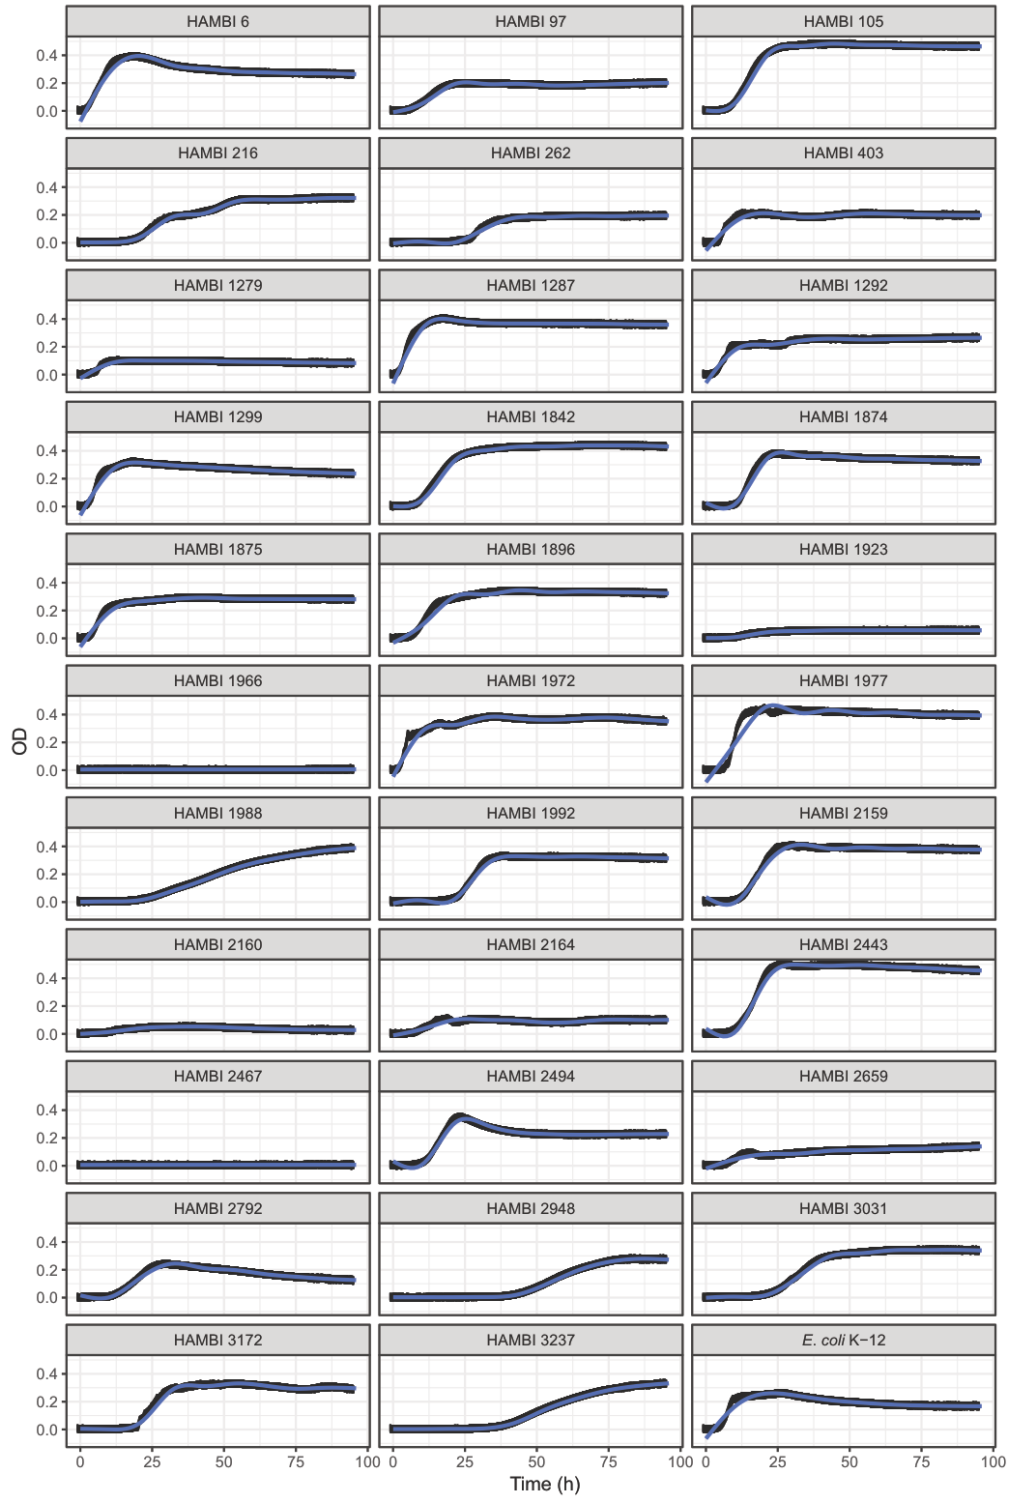

**Figure S1.** Growth curves of HMC 33.1 strains cultured separately for 96 h in experimental medium. Each curve (black line) is based on four technical replicates, and a smoother (blue line) modeling the shape of the curve using a general additive model is also indicated. Measurements were performed with the Bioscreen C well-plate reader (Labsystems Oy, Helsinki, Finland) on clonal cultures diluted to low optical density (OD), using a wideband filter to measure OD<sub>420–580 nm</sub> at 5 min intervals.

**Table S1.** Composition of HAMBI Mock Community (HMC) 33.1 constructed for this study.

| Strain                                                  | Other ID*    | Genome accession | Database*<br>* |
|---------------------------------------------------------|--------------|------------------|----------------|
| <i>Acinetobacter johnsonii</i> strain HAMBI 97          | ATCC 9036    | —                | —              |
| <i>Aeromonas caviae</i> strain HAMBI 1972               | NCIMB 13016  | —                | —              |
| <i>Agrobacterium tumefaciens</i> strain HAMBI 105       | ATCC 4718    | —                | —              |
| <i>Azorhizobium caulinodans</i> strain HAMBI 216        | ORS 571 T    | GCF 000010525    | RefSeq         |
| <i>Azospirillum brasilense</i> strain HAMBI 3172        | LMG 4376     | —                | —              |
| <i>Bordetella avium</i> strain HAMBI 2160               | ATCC 35086 T | —                | —              |
| <i>Brevundimonas bullata</i> strain HAMBI 262           | ATCC 4278 T  | —                | —              |
| <i>Chitinophaga filiformis</i> strain HAMBI 1966        | DSM 527 T    | —                | —              |
| <i>Chitinophaga sancti</i> strain HAMBI 1988            | DSM 784 T    | GCF 900119105    | RefSeq         |
| <i>Citrobacter koseri</i> strain HAMBI 1287             | CUETM 77.4   | —                | —              |
| <i>Comamonas testosteroni</i> strain HAMBI 403          | ATCC 11996 T | GCF 000241525    | RefSeq         |
| <i>Cupriavidus necator</i> strain HAMBI 2164            | DSM 1105     | GCF 001592245    | RefSeq         |
| <i>Elizabethkingia meningoseptica</i> strain HAMBI 1875 | NCTC 10016   | GCF 000367325    | RefSeq         |
| <i>Escherichia coli</i> K-12 strain JE2571(RP4)         | —            | GCF 000005845    | RefSeq         |
| <i>Hafnia alvei</i> strain HAMBI 1279                   | ATCC 13337 T | GCF 000735375    | RefSeq         |
| <i>Kluyvera intermedia</i> strain HAMBI 1299            | ATCC 33110 T | GCF 001598315    | RefSeq         |
| <i>Microvirga lotononidis</i> strain HAMBI 3237         | WSM 3557     | GCF 000262405    | RefSeq         |
| <i>Moraxella canis</i> strain HAMBI 2792                | —            | —                | —              |
| <i>Morganella morganii</i> strain HAMBI 1292            | ATCC 25830   | GCF 001598895    | RefSeq         |
| <i>Myroides odoratus</i> strain HAMBI 1923              | NCTC 11036   | GCF 000243275    | RefSeq         |
| <i>Niabella yanshanensis</i> strain HAMBI 3031          | CCBAU 05354  | —                | —              |
| <i>Paraburkholderia caryophylli</i> strain HAMBI 2159   | DSM 50341 T  | —                | —              |
| <i>Paraburkholderia kururiensis</i> strain HAMBI 2494   | —            | —                | —              |
| <i>Paracoccus denitrificans</i> strain HAMBI 2443       | NCTC 11036   | GCF 900100045    | RefSeq         |
| <i>Phyllobacterium myrsinacearum</i> strain HAMBI 1992  | LMG 2(t2) T  | —                | —              |
| <i>Pseudomonas chlororaphis</i> strain HAMBI 1977       | ATCC 17415   | —                | —              |
| <i>Pseudomonas putida</i> strain HAMBI 6                | ATCC 11172   | —                | —              |
| <i>Psychrobacter proteolyticus</i> strain HAMBI 2948    | DSM 13887 T  | —                | —              |
| <i>Sphingobacterium multivorum</i> strain HAMBI 1874    | NCTC 11343   | Gp0013291        | JGI GOLD       |
| <i>Sphingobacterium spiritivorum</i> strain HAMBI 1896  | NCTC 11386   | GCF 000143765    | RefSeq         |
| <i>Sphingobium yanoikuyae</i> strain HAMBI 1842         | DSM 7462 T   | GCF 000315525    | RefSeq         |
| <i>Stenotrophomonas maltophilia</i> strain HAMBI 2659   | ATCC 13637   | GCF 000742995    | RefSeq         |
| <i>Thermomonas haemolytica</i> strain HAMBI 2467        | DSM 13605 T  | —                | —              |

\*T = type strain.

\*\*RefSeq accessions are for genome assemblies, and the JGI GOLD accession is for raw sequence data (fastq) files.

Culture collection acronyms: ATCC = American Type Culture Collection; CCBAU = Culture Collection of Beijing Agricultural University, People's Republic of China; CUETM = Collection de l'Unité d'Écotoxicologie Microbienne, Institut National de la Recherche Agronomique (INRA), France; DSM = DSMZ-Deutsche Sammlung von Mikroorganismen und Zellkulturen GmbH, Germany; HAMBI = University of Helsinki Culture Collection (UHCC); LMG = Collection of the Laboratorium voor Microbiologie en Microbiële Genetica, Rijksuniversiteit, Belgium; NCIMB = National Collection of Industrial and Marine Bacteria, National Collections of Industrial, Food and Marine Bacteria, UK; NCTC = National Collection of Type Cultures, Central Public Health Laboratory, UK.

**Table S2.** Source of isolation of HMC 33.1 strains.

| <b>Strain</b>                                           | <b>Source of isolation</b>                                               |
|---------------------------------------------------------|--------------------------------------------------------------------------|
| <i>Acinetobacter johnsonii</i> strain HAMBI 97          | NA                                                                       |
| <i>Aeromonas caviae</i> strain HAMBI 1972               | Epizootic of young guinea pigs, KY, USA                                  |
| <i>Agrobacterium tumefaciens</i> strain HAMBI 105       | Soil, USA                                                                |
| <i>Azorhizobium caulinodans</i> strain HAMBI 216        | <i>Sesbania rostrata</i> stem nodules, North Senegal                     |
| <i>Azospirillum brasilense</i> strain HAMBI 3172        | <i>Oryza sativa</i> root, Bogor, Indonesia                               |
| <i>Bordetella avium</i> strain HAMBI 2160               | Respiratory tract of turkey poults, West Germany                         |
| <i>Brevundimonas bullata</i> strain HAMBI 262           | Soil                                                                     |
| <i>Chitinophaga filiformis</i> strain HAMBI 1966        | Soil, Samoa                                                              |
| <i>Chitinophaga sancti</i> strain HAMBI 1988            | Soil                                                                     |
| <i>Citrobacter koseri</i> strain HAMBI 1287             | NA                                                                       |
| <i>Comamonas testosteroni</i> strain HAMBI 403          | Soil, Berkeley                                                           |
| <i>Cupriavidus necator</i> strain HAMBI 2164            | Garden soil                                                              |
| <i>Elizabethkingia meningoseptica</i> strain HAMBI 1875 | Spinal fluid from premature infant, MA, USA                              |
| <i>Escherichia coli</i> K-12 strain JE2571(RP4)         | Human stool, Stanford, USA                                               |
| <i>Hafnia alvei</i> strain HAMBI 1279                   | NA                                                                       |
| <i>Kluyvera intermedia</i> strain HAMBI 1299            | Surface water, France                                                    |
| <i>Microvirga lotononidis</i> strain HAMBI 3237         | Nitrogen-fixing nodule of <i>Lotononsis angolensis</i> , Chibala, Zambia |
| <i>Moraxella canis</i> strain HAMBI 2792                | Dog's beard, Finland                                                     |
| <i>Morganella morganii</i> strain HAMBI 1292            | Human with summer diarrhea, London, UK                                   |
| <i>Myroides odoratus</i> strain HAMBI 1923              | Feces of patient with intestinal infection, Europe                       |
| <i>Niabella yanshanensis</i> strain HAMBI 3031          | Soybean rhizosphere, Hebei, China                                        |
| <i>Paraburkholderia caryophylli</i> strain HAMBI 2159   | Carnation, USA                                                           |
| <i>Paraburkholderia kururiensis</i> strain HAMBI 2494   | Printing paper machine, Finland                                          |
| <i>Paracoccus denitrificans</i> strain HAMBI 2443       | Garden soil, Delft, Netherlands                                          |
| <i>Phyllobacterium myrsinacearum</i> strain HAMBI 1992  | Leaf nodule of <i>Ardisia crispa</i> in tropical greenhouse, Germany     |
| <i>Pseudomonas chlororaphis</i> strain HAMBI 1977       | Farm soil, Peoria, IL, USA                                               |
| <i>Pseudomonas putida</i> strain HAMBI 6                | NA                                                                       |
| <i>Psychrobacter proteolyticus</i> strain HAMBI 2948    | Stomach specimen of Antarctic krill <i>Euphausia superba</i>             |
| <i>Sphingobacterium multivorum</i> strain HAMBI 1874    | Human clinical specimen, spleen, WA, USA                                 |
| <i>Sphingobacterium spiritivorum</i> strain HAMBI 1896  | Human, intra-uterine, KS, USA                                            |
| <i>Sphingobium yanoikuyae</i> strain HAMBI 1842         | Clinical specimen                                                        |
| <i>Stenotrophomonas maltophilia</i> strain HAMBI 2659   | Oropharyngeal region of patient with mouth cancer                        |
| <i>Thermomonas haemolytica</i> strain HAMBI 2467        | Kaolin slurry, Finland                                                   |

**Table S3.** Reference genomes used for genomic island prediction with incomplete genomes.

| Strain                                                  | Reference genome in IslandViewer 4 database                 |
|---------------------------------------------------------|-------------------------------------------------------------|
| <i>Acinetobacter johnsonii</i> strain HAMBI 97          | <i>Acinetobacter johnsonii</i> strain XBB1                  |
| <i>Aeromonas caviae</i> strain HAMBI 1972               | <i>Aeromonas</i> sp. strain CU5                             |
| <i>Agrobacterium tumefaciens</i> strain HAMBI 105       | <i>Agrobacterium tumefaciens</i> strain Ach5                |
| <i>Azorhizobium caulinodans</i> strain HAMBI 216        | NA (complete genome)                                        |
| <i>Azospirillum brasilense</i> strain HAMBI 3172        | <i>Azospirillum brasilense</i> strain Az39                  |
| <i>Bordetella avium</i> strain HAMBI 2160               | <i>Bordetella avium</i> strain 197N                         |
| <i>Brevundimonas bullata</i> strain HAMBI 262           | <i>Brevundimonas</i> sp. strain DS20                        |
| <i>Chitinophaga filiformis</i> strain HAMBI 1966        | <i>Chitinophaga pinensis</i> strain DSM 2588                |
| <i>Chitinophaga sancti</i> strain HAMBI 1988            | <i>Chitinophaga pinensis</i> strain DSM 2588                |
| <i>Citrobacter koseri</i> strain HAMBI 1287             | <i>Citrobacter koseri</i> strain ATCC BAA-895               |
| <i>Comamonas testosteroni</i> strain HAMBI 403          | <i>Comamonas testosteroni</i> strain CNB-2                  |
| <i>Cupriavidus necator</i> strain HAMBI 2164            | <i>Cupriavidus necator</i> strain N-1                       |
| <i>Elizabethkingia meningoseptica</i> strain HAMBI 1875 | <i>Elizabethkingia meningoseptica</i> strain G4076          |
| <i>Escherichia coli</i> K-12 strain JE2571(RP4)         | NA (complete genome)                                        |
| <i>Hafnia alvei</i> strain HAMBI 1279                   | <i>Hafnia alvei</i> strain FB1                              |
| <i>Kluyvera intermedia</i> strain HAMBI 1299            | <i>Enterobacter</i> sp. strain 638                          |
| <i>Microvirga lotononidis</i> strain HAMBI 3237         | <i>Microvirga ossetica</i> strain V5/3M                     |
| <i>Moraxella canis</i> strain HAMBI 2792                | <i>Moraxella ovis</i> strain 199/55                         |
| <i>Morganella morganii</i> strain HAMBI 1292            | <i>Morganella morganii</i> subsp. <i>Morganii</i> strain KT |
| <i>Myroides odoratus</i> strain HAMBI 1923              | NA (complete genome)                                        |
| <i>Niabella yanshanensis</i> strain HAMBI 3031          | <i>Niabella soli</i> strain DSM 19437                       |
| <i>Paraburkholderia caryophylli</i> strain HAMBI 2159   | <i>Paraburkholderia</i> sp. strain SOS3                     |
| <i>Paraburkholderia kururiensis</i> strain HAMBI 2494   | <i>Paraburkholderia</i> sp. strain SOS3                     |
| <i>Paracoccus denitrificans</i> strain HAMBI 2443       | <i>Paracoccus denitrificans</i> strain PD1222               |
| <i>Phyllobacterium myrsinacearum</i> strain HAMBI 1992  | <i>Phyllobacterium</i> sp. strain Tri-48                    |
| <i>Pseudomonas chlororaphis</i> strain HAMBI 1977       | <i>Pseudomonas chlororaphis</i> strain PA23                 |
| <i>Pseudomonas putida</i> strain HAMBI 6                | <i>Pseudomonas putida</i> strain KT2440                     |
| <i>Psychrobacter proteolyticus</i> strain HAMBI 2948    | <i>Psychrobacter</i> sp. strain G                           |
| <i>Sphingobacterium multivorum</i> strain HAMBI 1874    | <i>Sphingobacterium</i> sp. strain 21                       |
| <i>Sphingobacterium spiritivorum</i> strain HAMBI 1896  | <i>Sphingobacterium</i> sp. strain 21                       |
| <i>Sphingobium yanoikuyae</i> strain HAMBI 1842         | <i>Sphingomonas</i> sp. strain JJ-A5                        |
| <i>Stenotrophomonas maltophilia</i> strain HAMBI 2659   | NA (complete genome)                                        |
| <i>Thermomonas haemolytica</i> strain HAMBI 2467        | NA (closely related reference not found)                    |
